# Supplementary material
Source: Springer Nature journal article supplement (https://www.springermedizin.de/resource/supplementary/12958_2012_1000_MOESM4_ESM.pdf/9566606)

**mutant**

**control**

**A**

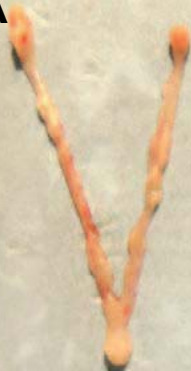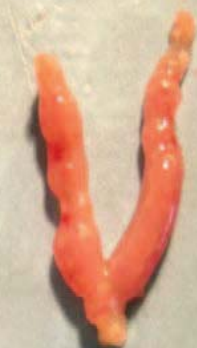

**B**

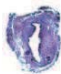

**C**

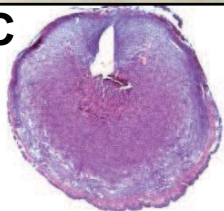

**D**

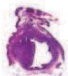

**E**

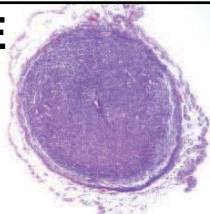

Supplement: MOESM4 [file 9566606]
